# Supplementary material for: ORRM5, an RNA recognition motif-containing protein, has a unique effect on mitochondrial RNA editing
Source: PubMed Central journal article supplement (PMC5853588; doi:10.1093/jxb/erx139), 2017-05-26
Supplement: erx139_suppl_supplementary_figures_s1_s9.pdf [file erx139_suppl_supplementary_figures_s1_s9.pdf]

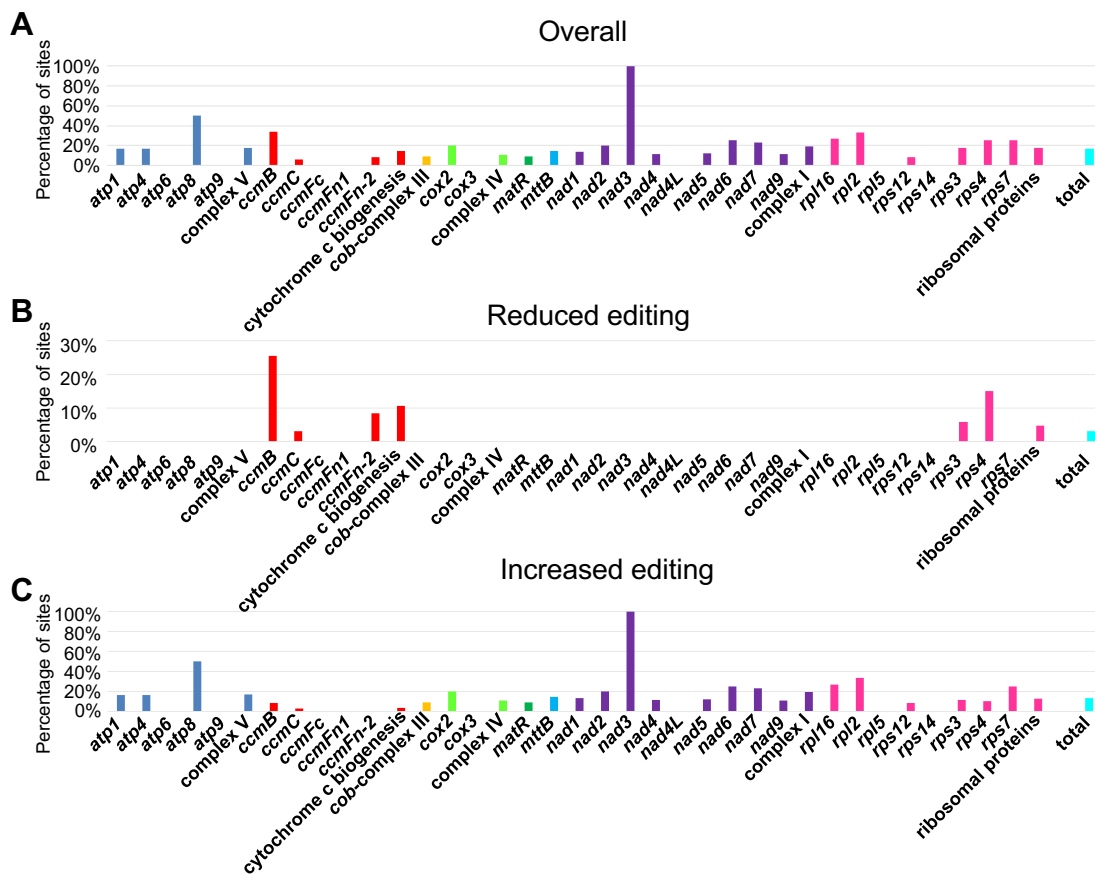

**Supplementary Figure S1.** Percentage of affected edited sites/transcript in the *orrm5* mutants. (A) Percentage of sites affected by *ORRM5* mutations on each transcript. Each bar represents a transcript color-coded according to the complex to which it belongs. (B) Percentage of sites experiencing reduced editing extents by *ORRM5* mutations on each transcript. (C) Percentage of sites showing increased editing efficiency on each transcript as a result of *orrm5* mutations.

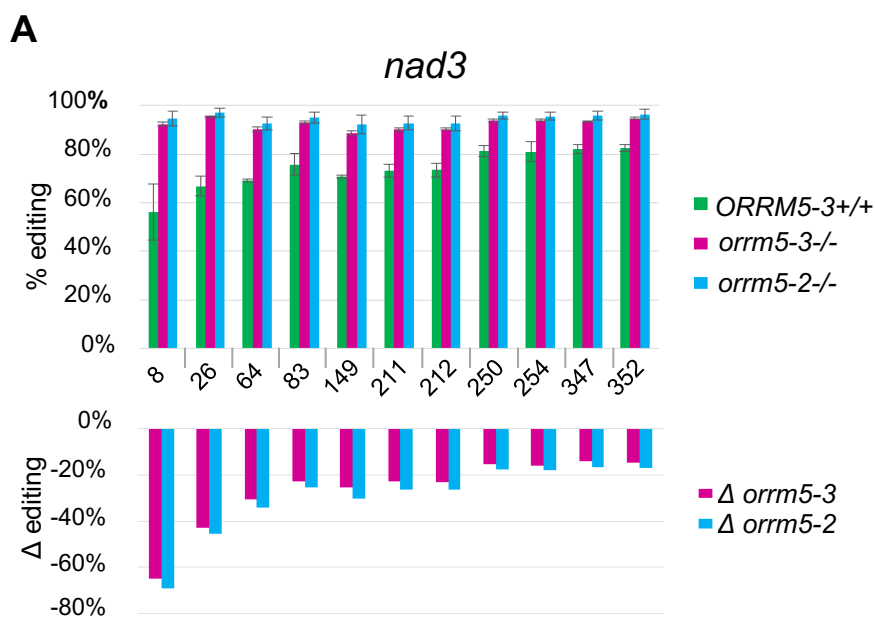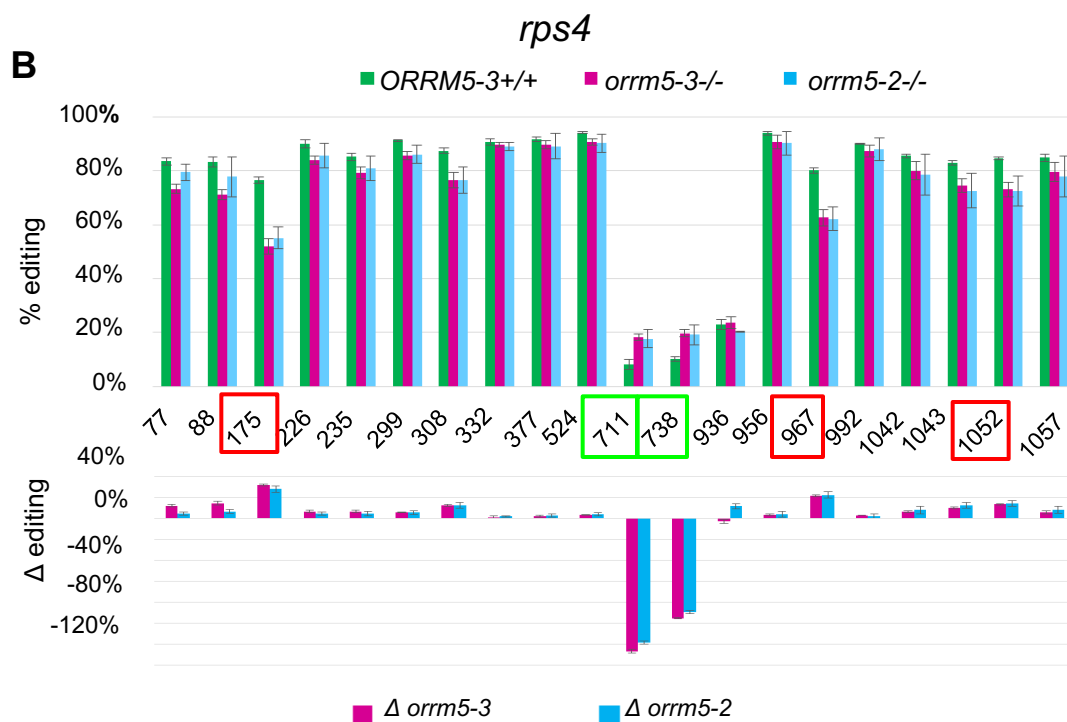

**Supplementary Figure S2.** Editing on the *nad3* and *rps4* transcripts is affected by *ORRM5* mutation. *ORRM5-3+/+*, wild-type siblings of *ormm5-3* mutants; *ormm5-3 -/-*, *ormm5-3* homozygous mutants; *ormm5-2-/-*, *ormm5-2* homozygous mutants (n=2). **(A)** *ORRM5* mutations result in increased editing extent at all the mitochondrial C targets on the *nad3* transcript. X-axis represents position of different editing sites on the *nad3* transcript. The lower panel represents the variation in editing extent ( $\Delta$  editing);  $\Delta$ *ormm5-2*, (% editing of *ORRM5-3+/+* minus % editing of *ormm5-2-/-*) / % editing of *ORRM5-3+/+*;  $\Delta$ *ormm5-3*, (% editing of *ORRM5-3+/+* minus % editing of *ormm5-3-/-*) / % editing of *ORRM5-3+/+*. **(B)** Effects of *ORRM5* mutations on mitochondrial RNA editing on the *rps4* transcript. Like in Figure 4A, the upper panel represents editing extent at different sites on the transcript with the location on the X axis. Sites experiencing a significant reduction of editing extents ( $\Delta \geq 10\%$ ,  $P < 1.6e-6$ ) are in red squares, whereas sites showing an increase of editing extents are in green squares ( $\Delta \geq 10\%$ ,  $P < 1.6e-6$ ). The lower panel represents the variation in editing extent ( $\Delta$  editing) with  $\Delta$ *ormm5-2* and  $\Delta$ *ormm5-3* calculated as in Figure 4A.

**A**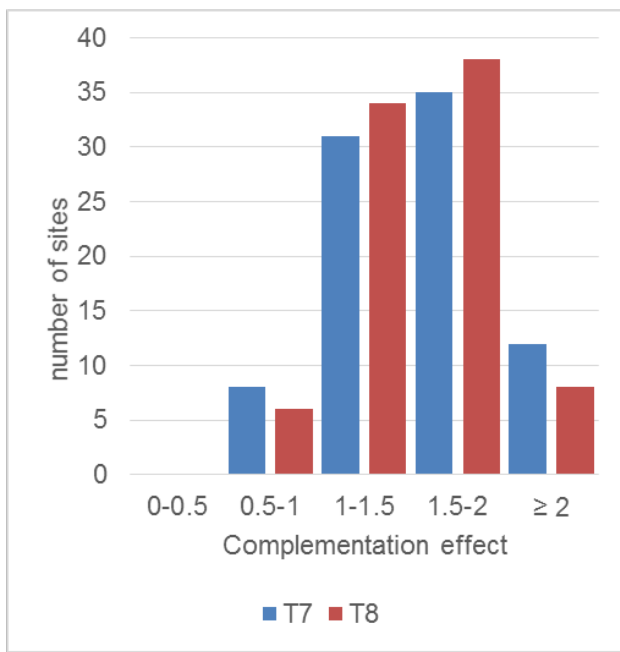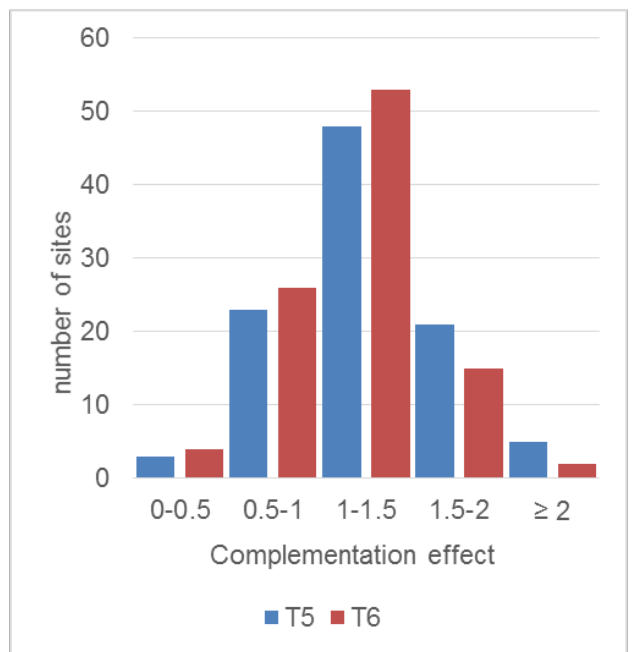**B**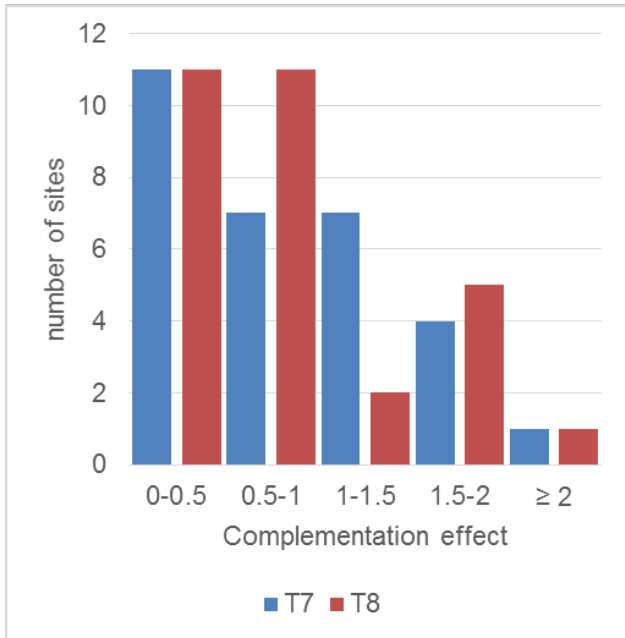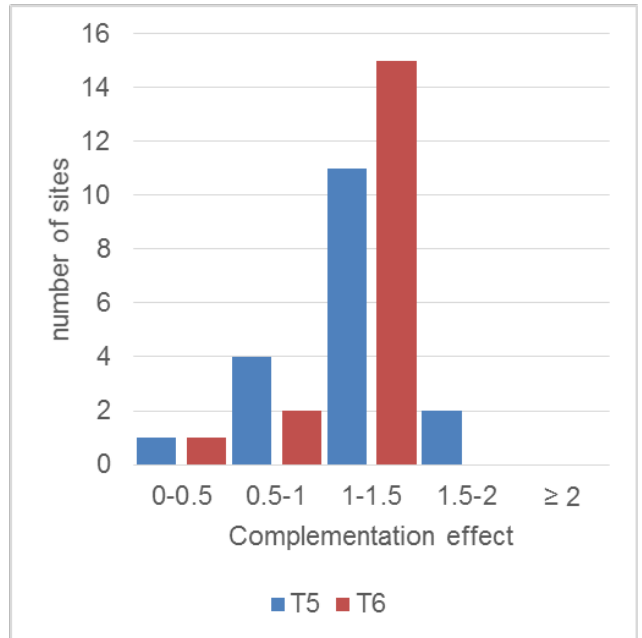

**Supplementary Figure S3.** Distribution of the editing sites that showed a significant change of editing extent in the mutant lines (vs. the wild-type) in the transgenic lines transformed with the full length *ORRM5* according to the complementation effect. The complementation effect is calculated as  $(\% \text{ editing in transgenic} - \% \text{ editing in mutant}) / (\% \text{ editing in wild-type} - \% \text{ editing in mutant})$ . The complementation effect is a measure of the response observed in the transgenic lines in relation to the one observed in the wild-type; when this metric equals 1 the response in the transgenic is similar to the one observed in the wild-type. **(A)** Distribution for the sites that were significantly increased in the mutant plants. **(B)** Distribution for the sites that were significantly decreased in the mutant plants. T7 and T8, *orm5-3* transgenic lines, T5 and T6, *orm5-2* transgenic lines.

**A** Sites invariant in *orrm5-3-/-*

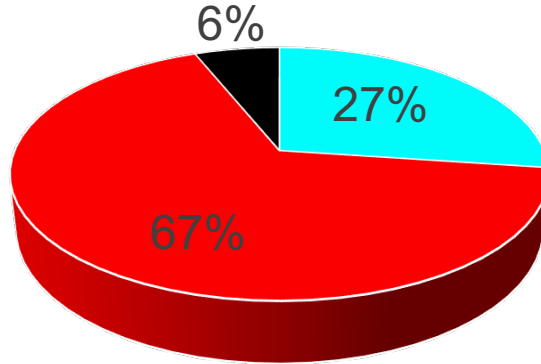

- sites invariant in both T7 and T8
- sites decreased in T7 and/or T8
- sites increased in T7 and/or T8

**B** Sites invariant in *orrm5-2-/-*

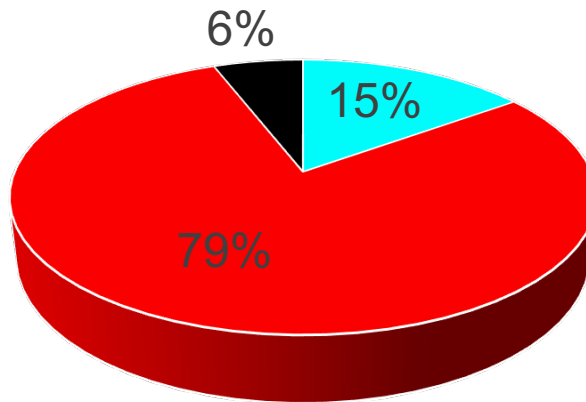

- sites invariant in both T5 and T6
- sites decreased in T5 and/or T6
- sites increased in T5 and/or T6

**Supplementary Figure S4.** Distribution and behavior of the editing sites that did not show any significant change in the mutant lines (vs. the wild-type) in the transgenic lines transformed with the full length *ORRM5*. **(A)** Distribution in T7 and T8, *orrm5-3* transgenic lines. **(B)** Distribution in T5 and T6, *orrm5-2* transgenic lines.

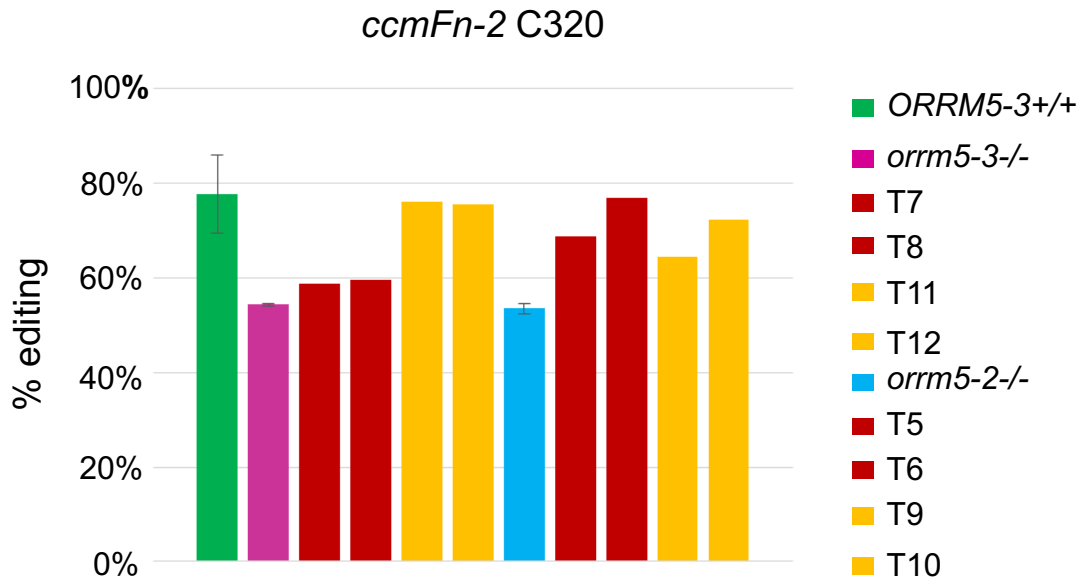

**Supplementary Figure S5.** Editing defect at the *ccmFn-2* C320 site in the *ormm5* mutants and its complementation by expressing *ORRM5* or the N-terminal RRM domain of *ORRM5* (*nORRM5*). Editing extents were measured by STS-PCRseq. T7 and T8: *ormm5-3-/-* w/35S:: *ORRM5*; T11 and T12: *ormm5-3-/-* w/35S:: *nORRM5*; T5 and T6: *ormm5-2-/-* w/35S:: *ORRM5*; T9 and T10: *ormm5-2-/-* w/35S:: *nORRM5*. Both *ormm5-3* and *ormm5-2* mutants show a decrease of editing extent compared to the *ORRM5-3* wild-type. In *ormm5-3* transgenic plants, only the RRM (T11, T12) is able to complement the editing defect to wild-type level. In *ormm5-2* transgenic plants, both the full length *ORRM5* (T5, T6) and the RRM (T9, T10) are able to complement the editing defect to wild-type level or lower. Values represent mean  $\pm$  SD for *ORRM5-3+/+*, *ormm5-3-/-*, and *ormm5-2-/-* (n=2).

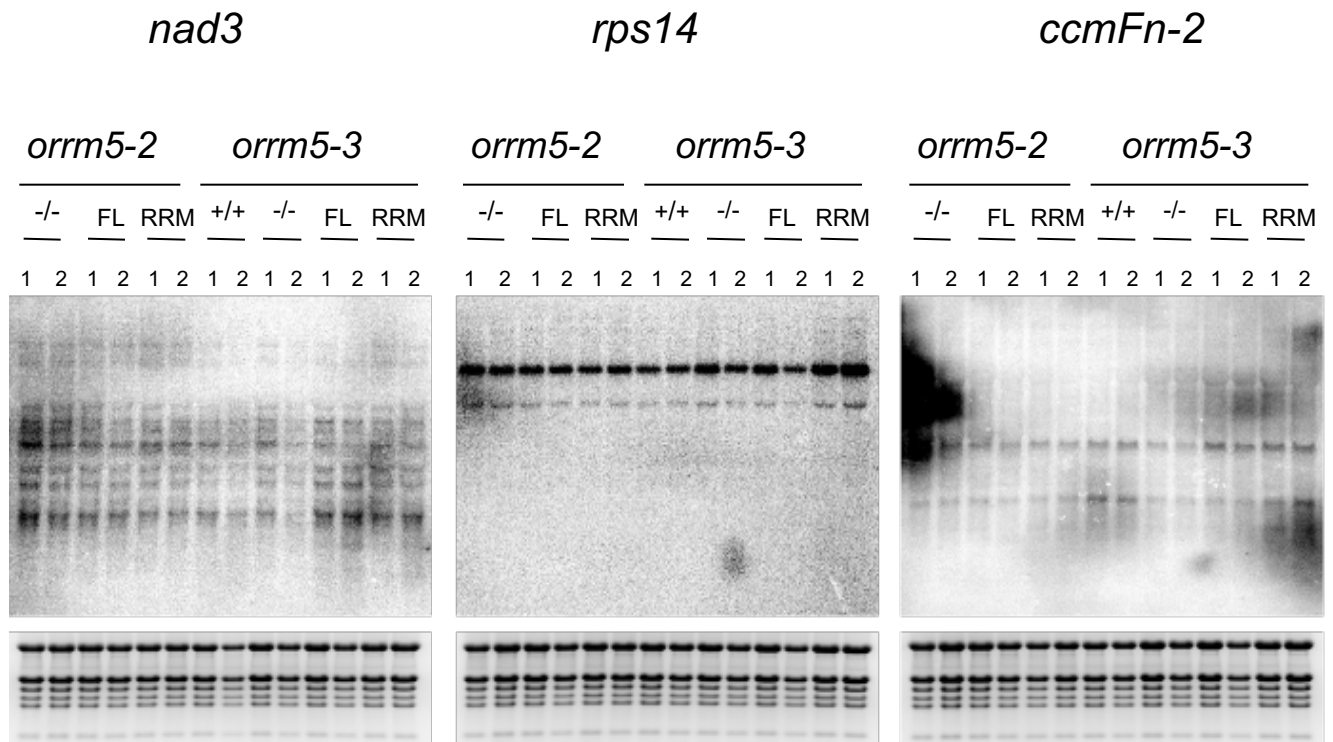

**Supplementary Figure S6.** Transcript abundance of *nad3*, *rps14* and *ccmFn-2* in the *orm5* mutants versus the controls examined by RNA blots. *orm5-2*, plants in an *orm5-2* homozygous mutant background; *orm5-3*, plants in an *orm5-3* homozygous mutant background; +/+, wild-type siblings of *orm5-3* mutants. -/-, mutant plants that do not contain the *ORRM5* or *nORRM5* transgene; FL, mutant plants transformed with the coding sequence of *ORRM5* under a 35S promoter; RRM, mutant plants transformed with the N-terminal RRM motif of *ORRM5* under a 35S promoter. The negative of the ethidium bromide staining gel in the bottom panel serves as a loading control.

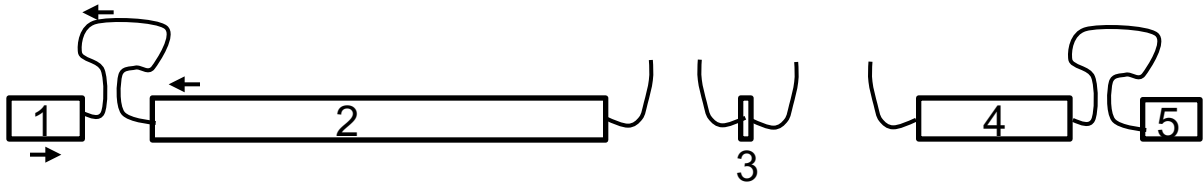

**Supplementary Figure S7.** Representation of the complex structure of the *nad5* transcript. The five exons are symbolized by squares drawn to scale and numbered 1 to 5. The introns are sketched as solid lines. The maturation of *nad5* transcript necessitates two *cis*-splicing events to join exon1 and exon2 and exon4 and exon5. In addition, two *trans*-splicing events are needed to join exon3 to exon2 and exon4. The arrows represent the primers used in the qRT-PCR assay to determine the splicing efficiency of intron1.

|                    | <i>orrm5</i> up       | <i>orrm5</i> other      |     |
|--------------------|-----------------------|-------------------------|-----|
| <i>orrm2</i> down  | 16<br>5.13<br>(23.03) | 23<br>33.87<br>(3.49)   | 39  |
| <i>orrm2</i> other | 57<br>67.87<br>(1.74) | 459<br>448.13<br>(0.26) | 516 |
|                    | 73                    | 482                     | 555 |

$$\chi^2 = 28.528 \quad P = 9 \text{ e-}8$$

|                    | <i>orrm5</i> up       | <i>orrm5</i> other      |     |
|--------------------|-----------------------|-------------------------|-----|
| <i>orrm3</i> down  | 21<br>7.63<br>(23.44) | 37<br>50.37<br>(3.55)   | 58  |
| <i>orrm3</i> other | 52<br>65.37<br>(2.73) | 445<br>431.63<br>(0.41) | 497 |
|                    | 73                    | 482                     | 555 |

$$\chi^2 = 30.134 \quad P = 4 \text{ e-}8$$

|                    | <i>orrm5</i> up       | <i>orrm5</i> other      |     |
|--------------------|-----------------------|-------------------------|-----|
| <i>orrm4</i> down  | 19<br>29.73<br>(3.87) | 207<br>196.27<br>(0.59) | 226 |
| <i>orrm4</i> other | 54<br>43.27<br>(2.66) | 275<br>285.73<br>(0.40) | 329 |
|                    | 73                    | 482                     | 555 |

$$\chi^2 = 7.518 \quad P = 6 \text{ e-}3$$

**Supplementary Figure S8.** Contingency tables of the number of mitochondrial sites experiencing an increase in *orrm5* mutant (*orrm5* up) or no increase in *orrm5* mutant (*orrm5* other) and a decrease in other mitochondrial editing factors (*orrm2*, *orrm3*, or *orrm4* down) or no decrease in these mutants or silenced tissues (*orrm2*, *orrm3*, or *orrm4* other). The results with *orrm2* were obtained on silenced tissues. The observed number of sites are in plain character while the expected values are in italics, and the individual  $\chi^2$  are displayed in parentheses. Below each contingency table is given the  $\chi^2$  value for a test of independence and the p value. The total number of mitochondrial sites commonly surveyed between this study and the previous studies on ORRM2, ORRM3, and ORRM4 is 555.



**A**

|                   | T7,T8 down              | T7,T8 other             |     |
|-------------------|-------------------------|-------------------------|-----|
| <i>orm2</i> down  | 15<br>5.54<br>(16.13)   | 6<br>15.46<br>(5.79)    | 21  |
| <i>orm2</i> other | 103<br>112.46<br>(0.80) | 323<br>313.54<br>(0.29) | 426 |
|                   | 118                     | 329                     | 447 |

$$\chi^2 = 23 \quad P = 2 \text{ e-}6$$

|                   | T7,T8 down            | T7,T8 other            |     |
|-------------------|-----------------------|------------------------|-----|
| <i>orm3</i> down  | 28<br>9.5<br>(36)     | 8<br>26.5<br>(12.9)    | 36  |
| <i>orm3</i> other | 90<br>108.5<br>(3.15) | 321<br>302.5<br>(1.13) | 411 |
|                   | 118                   | 329                    | 447 |

$$\chi^2 = 53.2 \quad P = 0$$

**B**

|                   | T5,T6 down            | T5,T6 other             |     |
|-------------------|-----------------------|-------------------------|-----|
| <i>orm2</i> down  | 11<br>2.74<br>(24.88) | 9<br>17.26<br>(3.95)    | 20  |
| <i>orm2</i> other | 50<br>58.26<br>(1.17) | 375<br>366.74<br>(0.19) | 425 |
|                   | 61                    | 384                     | 445 |

$$\chi^2 = 30.19 \quad P = 4 \text{ e-}8$$

|                   | T5,T6 down            | T5,T6 other             |     |
|-------------------|-----------------------|-------------------------|-----|
| <i>orm3</i> down  | 22<br>4.25<br>(74.15) | 9<br>26.75<br>(11.78)   | 31  |
| <i>orm3</i> other | 39<br>56.75<br>(5.55) | 375<br>357.25<br>(0.88) | 414 |
|                   | 61                    | 384                     | 445 |

$$\chi^2 = 92.36 \quad P = 0$$

**Supplementary Figure S9.** Contingency tables of the number of mitochondrial sites experiencing either a decrease in transgenic lines, (T7, T8 down) or (T5, T6 down), or no decrease in transgenic lines, (T7, T8 other) or (T5, T6 other), and a decrease in other mitochondrial editing factors (*orm2* or *orm3* down) or no decrease in these mutants or silenced tissues (*orm2*, *orm3* other). The results with *orm2* were obtained on silenced tissues. This analysis is restricted to the invariant sites that did not show significant change in the mutant plants either *orm5-3*, or *orm5-2* when compared to the wild-type. The observed number of sites are in plain character while the expected values are in italics, and the individual  $\chi^2$  are displayed in parentheses. Below each contingency table is given the  $\chi^2$  value for a test of independence and the p value. **(A)** Contingency tables obtained with *orm5-3* transgenic lines. **(B)** Contingency tables obtained with *orm5-2* transgenic lines
